# Supplementary material
Source: PubMed Central journal article supplement (PMC6805107)
Supplement: JB.00307-19-s0007.pdf [file JB.00307-19-s0007.pdf]

1 **SUPPLEMENTAL MATERIAL**

2 Conceptual Model of Biofilm Antibiotic Tolerance that Integrates Phenomena of Diffusion,  
3 Metabolism, Gene Expression, and Physiology

4 Philip S. Stewart, Ben White, Laura Boegli, Timothy Hamerly, Kerry S. Williamson, Michael J.  
5 Franklin, Brian Bothner, Garth A. James, Steve Fisher, Francisco G. Vital-Lopez, Anders  
6 Wallqvist

7  
8 **Table S1.** Parameter values for reaction-diffusion modeling of oxygen penetration into *P.*  
9 *aeruginosa* drip-flow biofilm.

---

| Parameter                                        | Value                                                  | Source                                                                  |
|--------------------------------------------------|--------------------------------------------------------|-------------------------------------------------------------------------|
| cell volume fraction                             | 0.212                                                  | to match experimental biomass concentration of 63,500 g m <sup>-3</sup> |
| biomass intrinsic density                        | 300,000 g m <sup>-3</sup>                              | typical bacterium                                                       |
| external mass transfer liquid layer thickness    | 10 <sup>-2</sup> or 10 <sup>2</sup> μm                 | to bound anticipated dimensions                                         |
| biofilm relative effective diffusion coefficient | 0.6                                                    | (1)                                                                     |
| oxygen aqueous diffusion coefficient             | 2.11 x 10 <sup>-4</sup> m <sup>2</sup> d <sup>-1</sup> | (1)                                                                     |
| lactic acid aqueous diffusion coefficient        | 1.12 x 10 <sup>-4</sup> m <sup>2</sup> d <sup>-1</sup> | (2)                                                                     |
| bulk fluid oxygen concentration                  | 6 g m <sup>-3</sup>                                    | air saturation in Bozeman, MT                                           |
| maximum specific growth rate                     | 26.2 d <sup>-1</sup>                                   | experimentally measured                                                 |
| yield coefficient, biomass on oxygen             | 1.0 g g <sup>-1</sup>                                  | typical value                                                           |
| yield coefficient, biomass on lactate            | 0.27 g g <sup>-1</sup>                                 | from elemental balances                                                 |
| Monod coefficient for oxygen                     | 0.39 g m <sup>-3</sup>                                 | from data in (3)                                                        |

---

11 **Table S2.** Analysis of ammonium production, pH change, and urea uptake in *P. aeruginosa*  
12 biofilm reactors. Ammonium production and urea uptake was determined as the difference  
13 between the concentration in the fresh medium and biofilm reactor effluent. WT – wild type;  
14 *ureA* – urease mutant; WT – no urea = urea omitted from medium. Values are given as the mean  
15  $\pm$  standard deviation.

| Condition    | (mM)            | $\Delta$ pH      | (mM)            |
|--------------|-----------------|------------------|-----------------|
|              | NH <sub>3</sub> |                  | Urea            |
| WT           | 1.49 $\pm$ 0.14 | -0.09 $\pm$ 0.12 | 0.65 $\pm$ 0.34 |
| <i>urea</i>  | 1.56 $\pm$ 0.34 | -0.28 $\pm$ 0.33 | 0.23 $\pm$ 0.32 |
| WT – no urea | 1.51 $\pm$ 0.03 | -0.01 $\pm$ 0.01 | 0               |

16

17 **Table S3.** Biofilm composition. Values are given as the mean  $\pm$  standard deviation.

| Condition   | ( $\mu\text{g cm}^{-2}$ )<br>Protein | ( $\mu\text{g cm}^{-2}$ )<br>Carbohydrate | ( $\mu\text{g cm}^{-2}$ )<br>DNA |
|-------------|--------------------------------------|-------------------------------------------|----------------------------------|
| Untreated   | 362 $\pm$ 141                        | 184 $\pm$ 20                              | 13.9 $\pm$ 1.5                   |
| CIP-treated | 83.4 $\pm$ 37.4                      | 109 $\pm$ 16                              | 10.7 $\pm$ 2.5                   |

18

19 **Table S4.** Calculated oxygen requirement for Psl extracellular polysaccharide biosynthesis from  
20 various substrates in *P. aeruginosa*.

21

| (C-mole PSL/mole O <sub>2</sub> ) |       |
|-----------------------------------|-------|
| Substrate                         | Yield |
| Alanine                           | 3.96  |
| Arginine                          | 2.54  |
| Aspartate                         | 7.26  |
| Cysteine                          | 0.00  |
| Glutamate                         | 3.62  |
| Glutamine                         | 3.47  |
| Glycine                           | 3.21  |
| Histidine                         | 2.54  |
| Isoleucine                        | 1.54  |
| Leucine                           | 1.54  |
| Lysine                            | 0.87  |
| Methionine                        | 0.00  |
| Phenylalanine                     | 1.30  |
| Proline                           | 2.08  |
| Serine                            | 2.61  |
| Threonine                         | 2.15  |
| Tryptophan                        | 1.50  |
| Tyrosine                          | 1.76  |
| Valine                            | 1.02  |
| Glucose                           | 12.57 |
| Lactate                           | 2.43  |

22

**Table S5.** Mutant strains used in this study. UW strains are from the University of Washington transposon collection (4).

| Strain                                                    | Genotype and relevant characteristics                           | Source or Reference |
|-----------------------------------------------------------|-----------------------------------------------------------------|---------------------|
| <i>P. aeruginosa</i> PAO1 $\Delta$ PA2231                 | <i>P. aeruginosa</i> with markerless <i>pslA</i> deletion       | (5)                 |
| <i>P. aeruginosa</i> PAO1 $\Delta$ PA0934 $\Delta$ PA5338 | <i>P. aeruginosa</i> with markerless <i>relAspoT</i> deletion   | (6)                 |
| <i>P. aeruginosa</i> PAO1 $\Delta$ PA3622                 | <i>P. aeruginosa</i> with markerless <i>rpoS</i> deletion       | (7)                 |
| <i>P. aeruginosa</i> PAO1 ISlacZ::PA5200                  | <i>P. aeruginosa</i> with transposon insertion in <i>amgR</i>   | UW strain PW9752    |
| <i>P. aeruginosa</i> PAO1 ISphoA::PA3540                  | <i>P. aeruginosa</i> with transposon insertion in <i>algD</i>   | UW strain PW6997    |
| <i>P. aeruginosa</i> PAO1 ISphoA::PA5100                  | <i>P. aeruginosa</i> with transposon insertion in <i>hutU</i>   | UW strain PW6916    |
| <i>P. aeruginosa</i> PAO1 ISphoA::PA4876                  | <i>P. aeruginosa</i> with transposon insertion in <i>osmE</i>   | UW strain PW9201    |
| <i>P. aeruginosa</i> PAO1 ISlacZ::PA2826                  | <i>P. aeruginosa</i> with transposon insertion in <i>PA2826</i> | UW strain PW5733    |
| <i>P. aeruginosa</i> PAO1 ISphoA::PA4217                  | <i>P. aeruginosa</i> with transposon insertion in <i>phzS</i>   | UW strain PW8154    |
| <i>P. aeruginosa</i> PAO1 ISphoA::PA4865                  | <i>P. aeruginosa</i> with transposon insertion in <i>ureA</i>   | UW strain PW9185    |
| <i>P. aeruginosa</i> PAO1 ISphoA::PA3064                  | <i>P. aeruginosa</i> with transposon insertion in <i>pelA</i>   | UW strain PW6141    |
| <i>P. aeruginosa</i> PAO1 ISlacZ::PA0927                  | <i>P. aeruginosa</i> with transposon insertion in <i>ldhA</i>   | UW strain PW2681    |
| <i>P. aeruginosa</i> PAO1 ISlacZ::PA0519                  | <i>P. aeruginosa</i> with transposon insertion in <i>nirS</i>   | UW strain PW1951    |
| <i>P. aeruginosa</i> PAO1 ISlacZ::PA2570                  | <i>P. aeruginosa</i> with transposon insertion in <i>lecA</i>   | UW strain PW5513    |
| <i>P. aeruginosa</i> PAO1 ISphoA::PA3361                  | <i>P. aeruginosa</i> with transposon insertion in <i>lecB</i>   | UW strain PW6664    |
| <i>P. aeruginosa</i> PAO1 ISlacZ::PA3478                  | <i>P. aeruginosa</i> with transposon insertion in <i>rhlB</i>   | UW strain PW6884    |
| <i>P. aeruginosa</i> PAO1 ISphoA::PA0524                  | <i>P. aeruginosa</i> with transposon insertion in <i>norB</i>   | UW strain PW1962    |
| <i>P. aeruginosa</i> PAO1 ISlacZ::PA2634                  | <i>P. aeruginosa</i> with transposon insertion in <i>aceA</i>   | UW strain PW5404    |

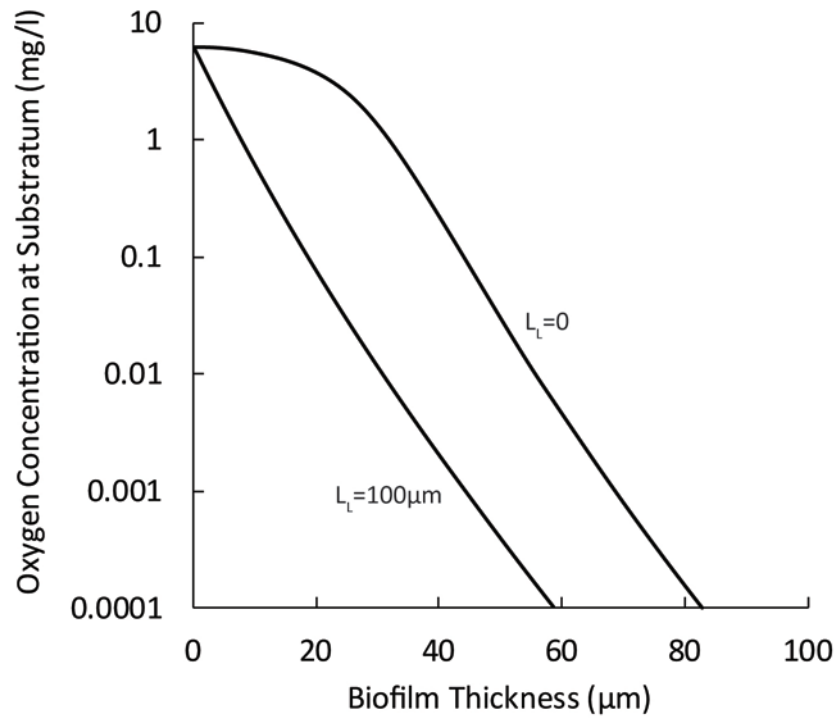

1

2 **Figure S1.** Reaction-diffusion modeling predicts oxygen limitation inside *P. aeruginosa*  
 3 biofilms. The concentration of oxygen at the base of the biofilm decreases geometrically with  
 4 increasing biofilm thickness. The parameter  $L_L$  denotes the thickness of an external mass  
 5 transfer fluid layer.

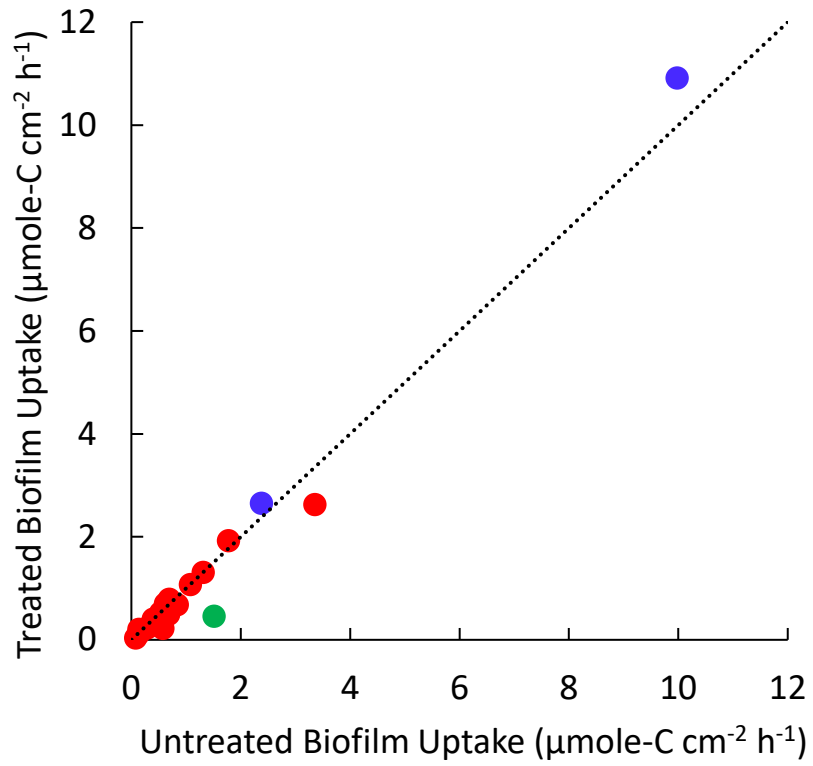

6

7 **Figure S2.** Continued utilization of carbon sources by *P. aeruginosa* biofilms treated with  
 8 ciprofloxacin for 24 h. Colors denote amino acids (red), lactate and glucose (blue), and the  
 9 excreted product acetate (green).

10

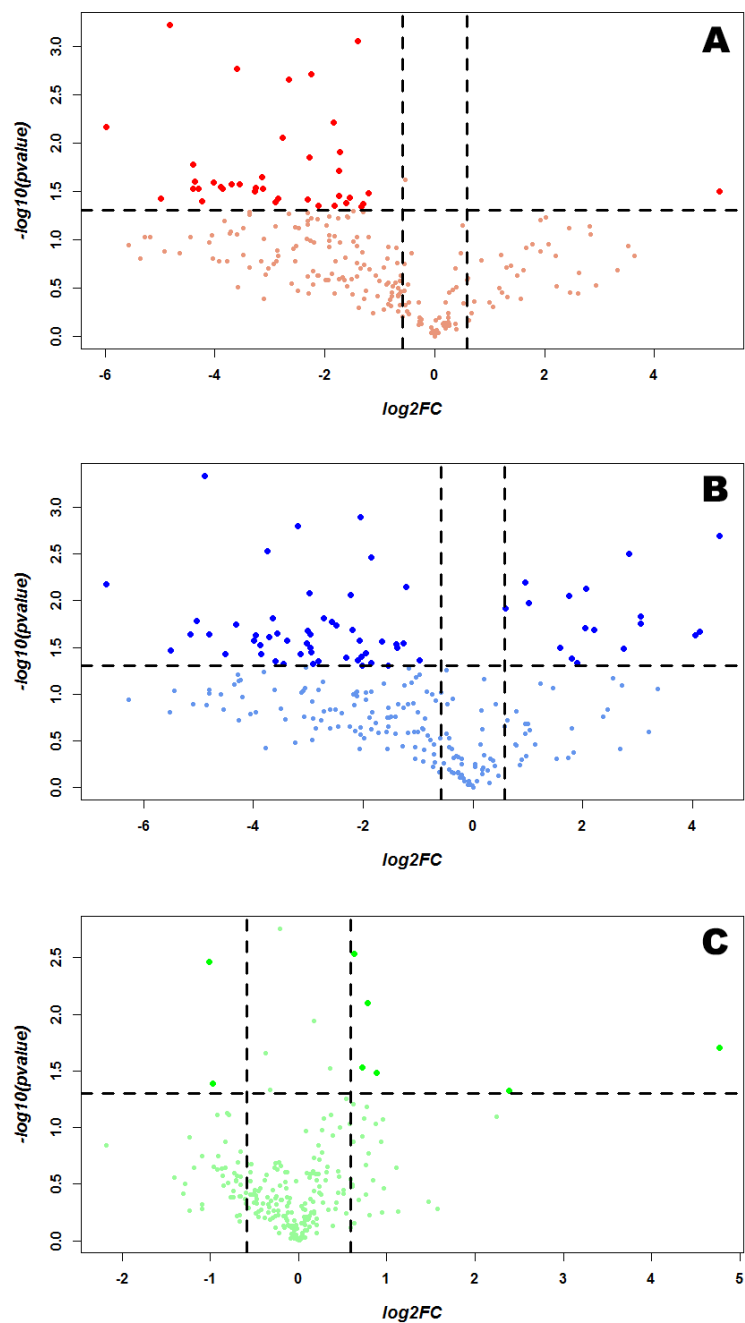

11

12

13 **Figure S3.** Volcano plot comparing metabolite concentrations between A, untreated biofilm and  
 14 planktonic; B, treated biofilm and planktonic; C, treated biofilm and untreated biofilm. For each  
 15 plot, comparisons were made such that a negative fold change correlates to decreased abundance  
 16 in the untreated biofilm (A), treated biofilm (B), or treated biofilm (C), while a positive fold  
 17 change indicates increased abundance for the same samples. Shown are metabolites with



18 tentative identifications. Those that were significantly different (fold change  $> 1.5$ ,  $p$ -value  
19  $< 0.05$ ) between the two conditions compared are denoted by larger, brighter circles.  
20 Metabolites above the dashed horizontal line have a  $p$ -value  $< 0.05$ , and metabolites to the left or  
21 right side of the vertical lines have a fold change  $> 1.5$ .

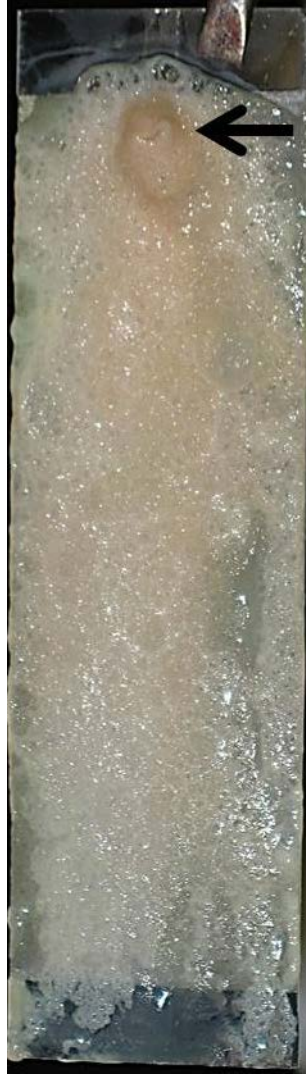

22

23

24 **Figure S4.** Image of untreated *P. aeruginosa* drip-flow biofilm at 96 h. Arrow indicates the spot

25 at which the medium dripped onto the slide.

26 **Computation of oxygen requirement to synthesize Psl from different carbon sources**

27 We computed the theoretical oxygen requirement to synthesize Psl from each of the carbon  
 28 sources present in the artificial chronic wound exudate (ACWE) medium (i.e., lactate, glucose  
 29 and the 20 amino acids). To perform this computation, we used a mathematical method called  
 30 flux balance analysis (FBA) (8). This method uses linear optimization to assess the capability of  
 31 a metabolic network to synthesize a metabolic product such as biomass or Psl. In FBA, the  
 32 metabolic network is represented as a linear system of algebraic equations:

|                                            |     |
|--------------------------------------------|-----|
| $\mathbf{S} \cdot \mathbf{v} = \mathbf{0}$ | (1) |
|--------------------------------------------|-----|

33 Where the stoichiometric matrix  $\mathbf{S}$  has dimensions  $n \times m$ , and  $\mathbf{v}$  is a  $m \times 1$  vector representing the  
 34 metabolic fluxes or rates of the metabolic reactions. The rows of  $\mathbf{S}$  represent the mass balances  
 35 of each of the  $n$  metabolites and each column represents the stoichiometry of each of the  $m$   
 36 reactions included in the network. Thus, the coefficients of a column of  $\mathbf{S}$  correspond to the  
 37 stoichiometric coefficients of the metabolites participating in the corresponding reaction. The  
 38 mass balances represented by Eq. 1 constrain the yield at which a metabolic network can  
 39 transform substrates into products. In this work, we used a *Pseudomonas aeruginosa* metabolic  
 40 network model with 584 metabolites and 702 metabolic reactions (9). The metabolic network  
 41 included all major known pathways of *P. aeruginosa* metabolism such as  
 42 glycolysis/gluconeogenesis, TCA cycle, pentose phosphate pathway, amino acids synthesis and  
 43 degradation, nucleic acid synthesis, as well as the Psl synthesis pathway.

44  
 45 To compute oxygen requirement to synthesize Psl from each carbon source in the ACWE, we  
 46 follow a two-step procedure. First, we solved the following optimization problem to obtain the  
 47 maximum Psl yield from each carbon source in the ACWE medium:

|                                                                                                                                                                                                                                                                                                    |     |
|----------------------------------------------------------------------------------------------------------------------------------------------------------------------------------------------------------------------------------------------------------------------------------------------------|-----|
| $\begin{aligned} & \max_{\mathbf{v}} v_{Psl} \\ & \text{s.t.} \\ & \mathbf{S} \cdot \mathbf{v} = \mathbf{0} \\ & \mathbf{l} \leq \mathbf{v} \leq \mathbf{u} \\ & v_i = 1, i \text{ denotes one of the carbon sources} \\ & v_j = 0, j \text{ denotes all carbon sources, except } i \end{aligned}$ | (2) |
|----------------------------------------------------------------------------------------------------------------------------------------------------------------------------------------------------------------------------------------------------------------------------------------------------|-----|

48 Where  $v_{Psl}$  denotes the synthesis rate of Psl,  $\mathbf{l}$  and  $\mathbf{u}$  are the lower and upper bounds of the  
 49 metabolic fluxes  $\mathbf{v}$ . For a carbon source  $i$ , its uptake flux is set to 1 (in arbitrary units), while the  
 50 uptake rates for the rest of the carbon sources are set to 0.

51

52 Then, we compute the minimum oxygen uptake required to attain the maximum Psl yield for  
 53 each carbon source by solving the following optimization problem:

|                                                                                                                                                                                                                                                                                                                             |     |
|-----------------------------------------------------------------------------------------------------------------------------------------------------------------------------------------------------------------------------------------------------------------------------------------------------------------------------|-----|
| $\begin{aligned} & \min_{\mathbf{v}} v_{oxy} \\ & \text{s.t.} \\ & \mathbf{S} \cdot \mathbf{v} = \mathbf{0} \\ & \mathbf{l} \leq \mathbf{v} \leq \mathbf{u} \\ & v_i = 1, i \text{ denotes one of the carbon sources} \\ & v_j = 0, j \text{ denotes all carbon sources, except } i \\ & v_{Psl} = v_{Psl,i} \end{aligned}$ | (3) |
|-----------------------------------------------------------------------------------------------------------------------------------------------------------------------------------------------------------------------------------------------------------------------------------------------------------------------------|-----|

54 Where  $v_{oxy}$  denotes the oxygen uptake rate and  $v_{Psl,i}$  denotes the maximum Psl yield for carbon  
 55 source  $i$ . The oxygen requirement to synthesize Psl from each carbon source is then obtained by  
 56 the ratio  $v_{Psl,i} / v_{oxy}$ . The results for each carbon source are provided in Table S4.

57

58

59 **References**

- 60 1. Stewart PS. 2003. Diffusion in biofilms. *J Bacteriol* 185:1485-1491.
- 61 2. Ribeiro ACF, Lobo VMM, Leaist DG, Natividade JJS, Veríssimo LP, Barros MCF and  
62 AMTDPV Cabral. 2005. Binary diffusion coefficients of aqueous solutions of lactic acid. *J*  
63 *Soln Chem* 34:1009-1016.
- 64 3. Alvarez-Ortega C, Harwood CS. 2007. Responses of *Pseudomonas aeruginosa* to low  
65 oxygen indicate that growth in the cystic fibrosis lung is by aerobic respiration. *Mol*  
66 *Microbiol* 65:153-165.
- 67 4. Jacobs MA, Alwood A, Thaipisuttikul I, Spencer D, Haugen E, Ernst S, Will O, Kaul R,  
68 Raymond C, Levy R, Chun-Rong L, Guenther D, Bovee D, Olson MV, Manoil C. 2003.  
69 Comprehensive transposon mutant library of *Pseudomonas aeruginosa*. *Proc Natl Acad Sci*  
70 *USA* 100:14339-14344.
- 71 5. Byrd MS, Sadovskaya I, Vinogradov E, Lu H, Sprinkle AB, Richardson SH, Ma L, Ralston  
72 B, Parsek MR, Anderson EM, Lam JS, Wozniak DJ. 2009. Genetic and biochemical analyses  
73 of the *Pseudomonas aeruginosa* Psl exopolysaccharide reveal overlapping roles for  
74 polysaccharide synthesis enzymes in Psl and LPS production. *Mol Microbiol* 73:622-638.
- 75 6. Nguyen D, Joshi-Datar A, Lepine F, Bauerle E, Olakanmi O, Beer K, McKay G, Siehnel R,  
76 Schafhauser J, Wang Y, Britigan BE, Singh PK. 2011. Active starvation responses mediate  
77 antibiotic tolerance in biofilms and nutrient-limited bacteria. *Science* 334:982-986.
- 78 7. Suh S-J, Silo-Suh L, Woods DE, Hassett DJ, West SHE, Ohman DE. 1999. Effect of *rpoS*  
79 mutation on the stress response and expression of virulence factors in *Pseudomonas*  
80 *aeruginosa*. *J Bacteriol* 181:3890-3897.
- 81 8. Orth JD, Thiele I, Palsson BØ. 2010. What is flux balance analysis? *Nat Biotechnol* 28:245-  
82 248.
- 83 9. Vital-Lopez FG, Reifman J, Wallqvist A. 2015. Biofilm formation mechanisms of  
84 *Pseudomonas aeruginosa* predicted via genome-scale kinetic models of bacterial  
85 metabolism. *PLoS Comput Biol* 11:e1004452.
